# Supplementary material for: Na3AEZn2B3O9 (AE = Mg, Ca): two new short-wave ultraviolet beryllium-free Sr2Be2B2O7-type zincoborates designed by chemical cosubstitution
Source: Royal Society of Chemistry journal article supplement (doi:10.1039/d2qi01251k), 2022-01-01
Supplement: d2qi01251k1.pdf [file d2qi01251k1.pdf]

Supporting Information

**Na<sub>3</sub>AEZn<sub>2</sub>B<sub>3</sub>O<sub>9</sub> (AE=Mg, Ca): Two New Short-Wave Ultraviolet  
Beryllium-Free Sr<sub>2</sub>Be<sub>2</sub>B<sub>2</sub>O<sub>7</sub>-type Zincoborates Designed by  
Chemical Cosubstitution**

Zhi Fang<sup>a</sup>, Chun-Li Hu<sup>a</sup>, Wen-Tong Chen<sup>\*b</sup> and Jiang-Gao Mao<sup>\*a</sup>

<sup>a</sup> State Key Laboratory of Structural Chemistry, Fujian Institute of Research on the Structure of Matter, Chinese Academy of Sciences, Fuzhou, Fujian 350002, P. R. China, E-mail: mjpg@fjirsm.ac.cn.

<sup>b</sup> Institute of Applied Chemistry, School of Chemistry and Chemical Engineering, Ji'an Key Laboratory of Photoelectric Crystal Materials and Device, Jiangxi Province Key Laboratory of Coordination Chemistry, Humic Acid Utilization Engineering Research Center of Jiangxi Province, Jinggangshan University, Ji'an, Jiangxi 343009, China, E-mail: wtchen\_2000@aliyun.com.

## CONTENTS

|                                                                                                                                                              |     |
|--------------------------------------------------------------------------------------------------------------------------------------------------------------|-----|
| <b>Table S1.</b> Fractional atomic coordinates and isotropic or equivalent isotropic displacement parameters ( $\text{\AA}^2$ ) for <b>I</b> and <b>II</b> . | S3  |
| <b>Table S2.</b> Atomic displacement parameters ( $\text{\AA}^2$ ) for <b>I</b> and <b>II</b> .                                                              | S4  |
| <b>Table S3.</b> Selected geometric parameters for <b>I</b> .                                                                                                | S5  |
| <b>Table S4.</b> Selected geometric parameters for <b>II</b> .                                                                                               | S8  |
| <b>Table S5.</b> Calculated bond valence sums (BVS) for <b>I</b> and <b>II</b> .                                                                             | S11 |
| <b>Atomic assignments in the structural refinement of I and II.</b>                                                                                          | S12 |

**Table S1.** Fractional atomic coordinates and isotropic or equivalent isotropic displacement parameters ( $\text{\AA}^2$ ) for I and II.

| <b>Atoms in I</b>  | <b>x</b>    | <b>y</b>    | <b>z</b>     | <b><math>U_{iso}^*/U_{eq}</math></b> | <b>Occ. (&lt;1)</b> |
|--------------------|-------------|-------------|--------------|--------------------------------------|---------------------|
| Na1                | 0.3836 (10) | 0.6164 (10) | 0.250000     | 0.018 (3)                            | 0.3333              |
| Na2                | 1.000000    | 1.000000    | 0.33680 (19) | 0.0229 (9)                           |                     |
| Ca1                | 1.000000    | 1.000000    | 0.500000     | 0.0093 (5)                           |                     |
| Zn1                | 0.666667    | 0.333333    | 0.39770 (5)  | 0.0110 (4)                           |                     |
| B1                 | 0.333333    | 0.666667    | 0.4235 (5)   | 0.0106 (17)                          |                     |
| B2                 | 0.607 (6)   | 0.303 (3)   | 0.250000     | 0.009 (7)                            | 0.3333              |
| O1                 | 0.6168 (8)  | 0.6791 (9)  | 0.4243 (2)   | 0.0184 (8)                           |                     |
| O2                 | 0.598 (6)   | 0.208 (3)   | 0.3065 (6)   | 0.038 (4)                            | 0.3333              |
| O3                 | 0.682 (8)   | 1.004 (8)   | 0.2506 (13)  | 0.039 (7)                            | 0.1667              |
| <b>Atoms in II</b> | <b>x</b>    | <b>y</b>    | <b>z</b>     | <b><math>U_{iso}^*/U_{eq}</math></b> | <b>Occ. (&lt;1)</b> |
| Na1                | 0.3848 (17) | 0.6152 (17) | 0.250000     | 0.060 (6)                            | 0.3333              |
| Na2                | 1.000000    | 1.000000    | 0.34133 (16) | 0.0283 (9)                           |                     |
| Mg1                | 1.000000    | 1.000000    | 0.500000     | 0.0029 (6)                           |                     |
| Zn1                | 0.666667    | 0.333333    | 0.40767 (4)  | 0.0125 (4)                           |                     |
| B1                 | 0.333333    | 0.666667    | 0.4332 (5)   | 0.0145 (17)                          |                     |
| B2                 | 0.587 (5)   | 0.294 (2)   | 0.250000     | 0.022 (6)                            | 0.3333              |
| O1                 | 0.6323 (7)  | 0.7016 (7)  | 0.43321 (15) | 0.0143 (7)                           |                     |
| O2                 | 0.609 (6)   | 0.219 (2)   | 0.3089 (5)   | 0.032 (3)                            | 0.3333              |
| O3                 | 0.657 (5)   | 0.978 (5)   | 0.2515 (9)   | 0.025 (5)                            | 0.1667              |

**Table S2.** Atomic displacement parameters ( $\text{\AA}^2$ ) for I and II.

| Atoms in I  | $U^{11}$    | $U^{22}$    | $U^{33}$    | $U^{12}$    | $U^{13}$     | $U^{23}$     |
|-------------|-------------|-------------|-------------|-------------|--------------|--------------|
| Na1         | 0.021 (4)   | 0.021 (4)   | 0.003 (3)   | 0.004 (3)   | 0.001 (3)    | 0.001 (3)    |
| Na2         | 0.0253 (14) | 0.0253 (14) | 0.0182 (18) | 0.0126 (7)  | 0.000        | 0.000        |
| Ca1         | 0.0099 (7)  | 0.0099 (7)  | 0.0081 (10) | 0.0050 (4)  | 0.000        | 0.000        |
| Zn1         | 0.0108 (4)  | 0.0108 (4)  | 0.0114 (6)  | 0.0054 (2)  | 0.000        | 0.000        |
| B1          | 0.009 (2)   | 0.009 (2)   | 0.014 (4)   | 0.0045 (12) | 0.000        | 0.000        |
| B2          | 0.006 (11)  | 0.011 (9)   | 0.009 (6)   | 0.003 (5)   | 0.000        | 0.000 (9)    |
| O1          | 0.0077 (18) | 0.0112 (16) | 0.037 (2)   | 0.0051 (15) | -0.0043 (15) | -0.0046 (16) |
| O2          | 0.056 (15)  | 0.035 (8)   | 0.013 (5)   | 0.016 (12)  | 0.001 (7)    | -0.001 (5)   |
| O3          | 0.051 (11)  | 0.051 (11)  | 0.018 (9)   | 0.028 (8)   | 0.004 (8)    | 0.001 (8)    |
| Atoms in II | $U^{11}$    | $U^{22}$    | $U^{33}$    | $U^{12}$    | $U^{13}$     | $U^{23}$     |
| Na1         | 0.048 (6)   | 0.048 (6)   | 0.026 (4)   | -0.019 (6)  | 0.004 (5)    | 0.004 (5)    |
| Na2         | 0.0323 (13) | 0.0323 (13) | 0.0204 (17) | 0.0162 (6)  | 0.000        | 0.000        |
| Mg1         | 0.0016 (8)  | 0.0016 (8)  | 0.0054 (14) | 0.0008 (4)  | 0.000        | 0.000        |
| Zn1         | 0.0124 (4)  | 0.0124 (4)  | 0.0126 (6)  | 0.0062 (2)  | 0.000        | 0.000        |
| B1          | 0.015 (3)   | 0.015 (3)   | 0.013 (4)   | 0.0075 (13) | 0.000        | 0.000        |
| B2          | 0.031 (11)  | 0.020 (7)   | 0.018 (7)   | 0.015 (5)   | 0.000        | 0.000 (8)    |
| O1          | 0.0092 (14) | 0.0098 (14) | 0.0242 (15) | 0.0048 (12) | 0.0007 (11)  | -0.0008 (12) |
| O2          | 0.044 (11)  | 0.034 (7)   | 0.013 (4)   | 0.017 (11)  | -0.016 (6)   | -0.004 (4)   |
| O3          | 0.023 (8)   | 0.049 (10)  | 0.006 (6)   | 0.020 (7)   | -0.001 (6)   | -0.003 (7)   |

**Table S3.** Selected geometric parameters for I.

| <b>Atoms 1,2</b>                        | <b>d 1,2 [Å]</b>       | <b>Atoms 1,2</b>                         | <b>d 1,2 [Å]</b>       |
|-----------------------------------------|------------------------|------------------------------------------|------------------------|
| Na1—O2 <sup>i</sup>                     | 2.212 (15)             | Ca1—O1 <sup>xi</sup>                     | 2.343 (4)              |
| Na1—O2 <sup>ii</sup>                    | 2.212 (15)             | Ca1—O1 <sup>vi</sup>                     | 2.343 (4)              |
| Na1—O3 <sup>iii</sup>                   | 2.09 (4)               | Ca1—O1 <sup>xii</sup>                    | 2.343 (4)              |
| Na1—O3 <sup>iv</sup>                    | 2.09 (4)               | Ca1—O1 <sup>xiii</sup>                   | 2.343 (4)              |
| Na2—O1                                  | 2.508 (5)              | Zn1—O1 <sup>xiv</sup>                    | 1.924 (4)              |
| Na2—O1 <sup>v</sup>                     | 2.508 (5)              | Zn1—O1 <sup>ii</sup>                     | 1.924 (4)              |
| Na2—O1 <sup>vi</sup>                    | 2.508 (5)              | Zn1—O1                                   | 1.924 (4)              |
| Na2—O2 <sup>ii</sup>                    | 2.67 (3)               | Zn1—O2 <sup>xiv</sup>                    | 1.937 (12)             |
| Na2—O2 <sup>iii</sup>                   | 2.67 (3)               | Zn1—O2                                   | 1.937 (12)             |
| Na2—O2 <sup>vii</sup>                   | 2.67 (3)               | Zn1—O2 <sup>ii</sup>                     | 1.937 (12)             |
| Na2—O3 <sup>viii</sup>                  | 2.38 (3)               | B1—O1                                    | 1.373 (3)              |
| Na2—O3 <sup>vi</sup>                    | 2.37 (3)               | B1—O1 <sup>xv</sup>                      | 1.373 (4)              |
| Na2—O3 <sup>v</sup>                     | 2.37 (3)               | B1—O1 <sup>iii</sup>                     | 1.373 (3)              |
| Na2—O3 <sup>ix</sup>                    | 2.38 (3)               | B2—O2 <sup>xiv</sup>                     | 1.40 (2)               |
| Na2—O3 <sup>x</sup>                     | 2.38 (3)               | B2—O2 <sup>xvi</sup>                     | 1.40 (2)               |
| Na2—O3                                  | 2.37 (3)               | B2—O3 <sup>xv</sup>                      | 1.45 (4)               |
| <b>Atoms 1,2,3</b>                      | <b>Angle 1,2,3 [°]</b> | <b>Atoms 1,2,3</b>                       | <b>Angle 1,2,3 [°]</b> |
| O2 <sup>ii</sup> —Na1—O2 <sup>i</sup>   | 62.9 (7)               | O1 <sup>xi</sup> —Ca1—O1 <sup>v</sup>    | 180.0                  |
| O3 <sup>iii</sup> —Na1—O2 <sup>ii</sup> | 142.1 (10)             | O1—Ca1—O1 <sup>xi</sup>                  | 98.76 (15)             |
| O3—Na1—O2 <sup>ii</sup>                 | 99.8 (13)              | O1—Ca1—O1 <sup>vi</sup>                  | 81.24 (15)             |
| O3 <sup>iv</sup> —Na1—O2 <sup>ii</sup>  | 141.7 (10)             | O1 <sup>xii</sup> —Ca1—O1 <sup>xi</sup>  | 81.24 (15)             |
| O3 <sup>xvi</sup> —Na1—O2 <sup>ii</sup> | 101.8 (13)             | O1—Ca1—O1 <sup>xiii</sup>                | 98.76 (15)             |
| O3 <sup>iv</sup> —Na1—O2 <sup>i</sup>   | 142.1 (10)             | O1 <sup>xii</sup> —Ca1—O1 <sup>v</sup>   | 98.76 (15)             |
| O3 <sup>xvi</sup> —Na1—O2 <sup>i</sup>  | 99.8 (13)              | O1 <sup>xiv</sup> —Zn1—O1                | 112.38 (11)            |
| O3 <sup>iii</sup> —Na1—O2 <sup>i</sup>  | 141.7 (10)             | O1 <sup>ii</sup> —Zn1—O1 <sup>xiv</sup>  | 112.38 (11)            |
| O3—Na1—O2 <sup>i</sup>                  | 101.8 (13)             | O1 <sup>ii</sup> —Zn1—O1                 | 112.38 (11)            |
| O3 <sup>ix</sup> —Na1—O3                | 61 (2)                 | O1—Zn1—O2 <sup>xiv</sup>                 | 108.5 (9)              |
| O3 <sup>xv</sup> —Na1—O3 <sup>iv</sup>  | 161 (2)                | O1 <sup>xiv</sup> —Zn1—O2                | 91.1 (5)               |
| O3 <sup>xvi</sup> —Na1—O3 <sup>iv</sup> | 100.0 (5)              | O1 <sup>ii</sup> —Zn1—O2 <sup>xiv</sup>  | 91.1 (5)               |
| O3 <sup>ix</sup> —Na1—O3 <sup>iii</sup> | 161 (2)                | O1—Zn1—O2 <sup>ii</sup>                  | 91.1 (5)               |
| O3 <sup>ix</sup> —Na1—O3 <sup>xv</sup>  | 83 (3)                 | O1—Zn1—O2                                | 118.4 (7)              |
| O3 <sup>xv</sup> —Na1—O3                | 144.0 (8)              | O1 <sup>ii</sup> —Zn1—O2 <sup>ii</sup>   | 118.4 (7)              |
| O3 <sup>ix</sup> —Na1—O3 <sup>xvi</sup> | 144.0 (8)              | O1 <sup>xiv</sup> —Zn1—O2 <sup>ii</sup>  | 108.5 (9)              |
| O3 <sup>xvi</sup> —Na1—O3               | 155 (2)                | O1 <sup>ii</sup> —Zn1—O2                 | 108.5 (9)              |
| O3—Na1—O3 <sup>iii</sup>                | 100.0 (5)              | O1 <sup>xiv</sup> —Zn1—O2 <sup>xiv</sup> | 118.4 (7)              |
| O3 <sup>ix</sup> —Na1—O3 <sup>iv</sup>  | 116.0 (5)              | O1 <sup>iii</sup> —B1—O1                 | 119.99 (2)             |
| O3 <sup>xv</sup> —Na1—O3 <sup>iii</sup> | 116.0 (5)              | O1 <sup>xv</sup> —B1—O1                  | 119.99 (2)             |

|                                            |            |                                             |             |
|--------------------------------------------|------------|---------------------------------------------|-------------|
| O3 <sup>xv</sup> —Na1—O3 <sup>xvi</sup>    | 61 (2)     | O1 <sup>iii</sup> —B1—O1 <sup>xv</sup>      | 119.99 (2)  |
| O1 <sup>vi</sup> —Na2—O1 <sup>v</sup>      | 74.93 (17) | O2 <sup>xiv</sup> —B2—O2 <sup>xvi</sup>     | 111 (2)     |
| O1 <sup>vi</sup> —Na2—O1                   | 74.93 (17) | O2—B2—O3 <sup>ix</sup>                      | 111.7 (12)  |
| O1 <sup>v</sup> —Na2—O1                    | 74.93 (17) | O2 <sup>xiv</sup> —B2—O3 <sup>xv</sup>      | 118.9 (15)  |
| O1 <sup>v</sup> —Na2—O2 <sup>iii</sup>     | 138.5 (4)  | O2 <sup>xiv</sup> —B2—O3 <sup>xvii</sup>    | 118.3 (15)  |
| O1—Na2—O2 <sup>iii</sup>                   | 100.4 (3)  | O2 <sup>xvi</sup> —B2—O3 <sup>xv</sup>      | 118.3 (15)  |
| O1 <sup>vi</sup> —Na2—O2 <sup>ii</sup>     | 138.5 (4)  | O2 <sup>i</sup> —B2—O3 <sup>xviii</sup>     | 111.7 (12)  |
| O1—Na2—O2 <sup>vii</sup>                   | 138.5 (4)  | O2 <sup>ii</sup> —B2—O3 <sup>xviii</sup>    | 111.7 (12)  |
| O1 <sup>vi</sup> —Na2—O2 <sup>vii</sup>    | 100.4 (3)  | O2 <sup>xvi</sup> —B2—O3 <sup>xvii</sup>    | 118.9 (15)  |
| O1 <sup>v</sup> —Na2—O2 <sup>ii</sup>      | 100.4 (3)  | Ca1—O1—Na2                                  | 86.64 (13)  |
| O1 <sup>vi</sup> —Na2—O2 <sup>iii</sup>    | 64.2 (3)   | Zn1—O1—Na2                                  | 88.26 (15)  |
| O1—Na2—O2 <sup>ii</sup>                    | 64.2 (3)   | Zn1—O1—Ca1                                  | 111.61 (16) |
| O1 <sup>v</sup> —Na2—O2 <sup>vii</sup>     | 64.2 (4)   | B1—O1—Na2                                   | 116.9 (4)   |
| O2 <sup>vii</sup> —Na2—O2 <sup>iii</sup>   | 114.8 (2)  | B1—O1—Ca1                                   | 120.0 (4)   |
| O2 <sup>ii</sup> —Na2—O2 <sup>vii</sup>    | 114.8 (2)  | B1—O1—Zn1                                   | 122.6 (3)   |
| O2 <sup>ii</sup> —Na2—O2 <sup>iii</sup>    | 114.8 (2)  | Na1 <sup>xiv</sup> —O2—Na1 <sup>xix</sup>   | 10.4 (3)    |
| O3 <sup>vi</sup> —Na2—O1 <sup>vi</sup>     | 103.9 (8)  | Na1 <sup>xiv</sup> —O2—Na2 <sup>xviii</sup> | 80.0 (7)    |
| O3 <sup>vi</sup> —Na2—O1 <sup>v</sup>      | 110.8 (8)  | Na1 <sup>xiv</sup> —O2—Na2 <sup>xx</sup>    | 81.3 (7)    |
| O3 <sup>ix</sup> —Na2—O1                   | 94.2 (8)   | Na2 <sup>xx</sup> —O2—Na1 <sup>xix</sup>    | 71.5 (5)    |
| O3 <sup>v</sup> —Na2—O1 <sup>v</sup>       | 103.9 (8)  | Na2 <sup>xviii</sup> —O2—Na1 <sup>xix</sup> | 84.9 (6)    |
| O3 <sup>vi</sup> —Na2—O1                   | 173.8 (8)  | Na2 <sup>xx</sup> —O2—Na2 <sup>xviii</sup>  | 132.7 (5)   |
| O3 <sup>xviii</sup> —Na2—O1 <sup>vi</sup>  | 134.2 (8)  | Zn1—O2—Na1 <sup>xiv</sup>                   | 137.5 (7)   |
| O3 <sup>ix</sup> —Na2—O1 <sup>vi</sup>     | 145.9 (8)  | Zn1—O2—Na1 <sup>xix</sup>                   | 130.4 (6)   |
| O3 <sup>v</sup> —Na2—O1                    | 110.8 (8)  | Zn1—O2—Na2 <sup>xviii</sup>                 | 81.9 (8)    |
| O3 <sup>ix</sup> —Na2—O1 <sup>v</sup>      | 134.2 (8)  | Zn1—O2—Na2 <sup>xx</sup>                    | 83.4 (8)    |
| O3—Na2—O1 <sup>v</sup>                     | 173.8 (8)  | B2 <sup>xiv</sup> —O2—Na1 <sup>xix</sup>    | 86.6 (8)    |
| O3 <sup>xviii</sup> —Na2—O1 <sup>v</sup>   | 94.2 (7)   | B2 <sup>ii</sup> —O2—Na1 <sup>xix</sup>     | 100.2 (10)  |
| O3 <sup>xviii</sup> —Na2—O1                | 145.9 (8)  | B2 <sup>ii</sup> —O2—Na1 <sup>xiv</sup>     | 93.1 (10)   |
| O3 <sup>v</sup> —Na2—O1 <sup>vi</sup>      | 173.8 (8)  | B2—O2—Na1 <sup>xiv</sup>                    | 78.4 (8)    |
| O3 <sup>x</sup> —Na2—O1 <sup>vi</sup>      | 94.2 (7)   | B2 <sup>xiv</sup> —O2—Na1 <sup>xiv</sup>    | 78.2 (8)    |
| O3 <sup>x</sup> —Na2—O1                    | 134.2 (8)  | B2—O2—Na1 <sup>xix</sup>                    | 84.1 (10)   |
| O3—Na2—O1 <sup>vi</sup>                    | 110.8 (8)  | B2 <sup>ii</sup> —O2—Na2 <sup>xviii</sup>   | 110.6 (15)  |
| O3—Na2—O1                                  | 103.9 (8)  | B2 <sup>ii</sup> —O2—Na2 <sup>xx</sup>      | 113.5 (15)  |
| O3 <sup>x</sup> —Na2—O1 <sup>v</sup>       | 145.9 (9)  | B2 <sup>xiv</sup> —O2—Na2 <sup>xx</sup>     | 120.5 (18)  |
| O3—Na2—O2 <sup>ii</sup>                    | 73.8 (9)   | B2 <sup>xiv</sup> —O2—Na2 <sup>xviii</sup>  | 97.4 (19)   |
| O3 <sup>v</sup> —Na2—O2 <sup>vii</sup>     | 73.8 (9)   | B2—O2—Na2 <sup>xviii</sup>                  | 117.4 (18)  |
| O3 <sup>ix</sup> —Na2—O2 <sup>vii</sup>    | 108.5 (9)  | B2—O2—Na2 <sup>xx</sup>                     | 101 (2)     |
| O3—Na2—O2 <sup>vii</sup>                   | 115.9 (8)  | B2 <sup>xiv</sup> —O2—Zn1                   | 142.4 (12)  |
| O3 <sup>x</sup> —Na2—O2 <sup>vii</sup>     | 86.9 (9)   | B2 <sup>ii</sup> —O2—Zn1                    | 129.2 (12)  |
| O3 <sup>xviii</sup> —Na2—O2 <sup>iii</sup> | 108.5 (8)  | B2—O2—Zn1                                   | 143.6 (12)  |
| O3 <sup>vi</sup> —Na2—O2 <sup>ii</sup>     | 115.9 (8)  | B2—O2—B2 <sup>xiv</sup>                     | 21 (2)      |
| O3 <sup>xviii</sup> —Na2—O2 <sup>ii</sup>  | 86.9 (9)   | B2—O2—B2 <sup>ii</sup>                      | 18.1 (17)   |
| O3 <sup>v</sup> —Na2—O2 <sup>iii</sup>     | 115.9 (8)  | B2 <sup>xiv</sup> —O2—B2 <sup>ii</sup>      | 18.2 (17)   |
| O3 <sup>x</sup> —Na2—O2 <sup>ii</sup>      | 108.5 (9)  | Na1 <sup>iii</sup> —O3—Na1                  | 24.0 (8)    |

|                                           |             |                                          |            |
|-------------------------------------------|-------------|------------------------------------------|------------|
| O3 <sup>ix</sup> —Na2—O2 <sup>iii</sup>   | 86.9 (9)    | Na1—O3—Na1 <sup>xv</sup>                 | 20.0 (5)   |
| O3 <sup>v</sup> —Na2—O3 <sup>x</sup>      | 83.5 (12)   | Na1 <sup>iii</sup> —O3—Na1 <sup>xv</sup> | 4.0 (5)    |
| O3 <sup>vi</sup> —Na2—O3                  | 70.8 (11)   | Na1 <sup>iii</sup> —O3—Na2               | 116.3 (17) |
| O3 <sup>viii</sup> —Na2—O3 <sup>x</sup>   | 70.2 (12)   | Na1 <sup>xv</sup> —O3—Na2                | 113.8 (13) |
| O3 <sup>v</sup> —Na2—O3 <sup>vi</sup>     | 70.8 (11)   | Na1—O3—Na2                               | 101.4 (14) |
| O3 <sup>v</sup> —Na2—O3                   | 70.8 (11)   | Na1 <sup>iii</sup> —O3—B2 <sup>iii</sup> | 111 (2)    |
| O3 <sup>vi</sup> —Na2—O3 <sup>ix</sup>    | 83.5 (12)   | Na1 <sup>iii</sup> —O3—B2 <sup>vi</sup>  | 111 (2)    |
| O3—Na2—O3 <sup>viii</sup>                 | 83.5 (12)   | Na1—O3—B2 <sup>vi</sup>                  | 134.5 (19) |
| O1—Ca1—O1 <sup>v</sup>                    | 81.24 (15)  | Na1 <sup>iii</sup> —O3—B2 <sup>xxi</sup> | 98 (2)     |
| O1 <sup>xii</sup> —Ca1—O1 <sup>xiii</sup> | 81.24 (15)  | B2 <sup>iii</sup> —O3—Na1 <sup>xv</sup>  | 115.2 (19) |
| O1 <sup>v</sup> —Ca1—O1 <sup>xiii</sup>   | 98.76 (15)  | B2 <sup>vi</sup> —O3—Na1 <sup>xv</sup>   | 114.6 (16) |
| O1 <sup>xii</sup> —Ca1—O1 <sup>vi</sup>   | 98.76 (15)  | B2 <sup>xxi</sup> —O3—Na1                | 122 (2)    |
| O1 <sup>xi</sup> —Ca1—O1 <sup>xiii</sup>  | 81.24 (15)  | B2 <sup>xxi</sup> —O3—Na1 <sup>xv</sup>  | 101.7 (17) |
| O1—Ca1—O1 <sup>xii</sup>                  | 180.00 (15) | B2 <sup>iii</sup> —O3—Na1                | 135 (2)    |
| O1 <sup>xi</sup> —Ca1—O1 <sup>vi</sup>    | 98.76 (15)  | B2 <sup>xxi</sup> —O3—Na2                | 116.7 (16) |
| O1 <sup>v</sup> —Ca1—O1 <sup>vi</sup>     | 81.24 (15)  | B2 <sup>iii</sup> —O3—Na2                | 108.7 (17) |
| O1 <sup>xiii</sup> —Ca1—O1 <sup>vi</sup>  | 180.0       | B2 <sup>vi</sup> —O3—Na2                 | 109.0 (14) |

(i)  $x, x-y, -z+1/2$ ; (ii)  $-x+y+1, -x+1, z$ ; (iii)  $-y+1, x-y+1, z$ ; (iv)  $-x+y, y, -z+1/2$ ; (v)  $-y+2, x-y+1, z$ ; (vi)  $-x+y+1, -x+2, z$ ; (vii)  $x+1, y+1, z$ ; (viii)  $-x+y+1, y, -z+1/2$ ; (ix)  $x, x-y+1, -z+1/2$ ; (x)  $-y+2, -x+2, -z+1/2$ ; (xi)  $y, -x+y+1, -z+1$ ; (xii)  $-x+2, -y+2, -z+1$ ; (xiii)  $x-y+1, x, -z+1$ ; (xiv)  $-y+1, x-y, z$ ; (xv)  $-x+y, -x+1, z$ ; (xvi)  $-y+1, -x+1, -z+1/2$ ; (xvii)  $-x+y, y-1, -z+1/2$ ; (xviii)  $x, y-1, z$ ; (xix)  $-x+y, -x, z$ ; (xx)  $x-1, y-1, z$ ; (xxi)  $x, y+1, z$ .

**Table S4.** Selected geometric parameters for II.

| <b>Atoms 1,2</b>                           | <b>d 1,2 [Å]</b>       | <b>Atoms 1,2</b>                           | <b>d 1,2 [Å]</b>       |
|--------------------------------------------|------------------------|--------------------------------------------|------------------------|
| Na1—O2 <sup>i</sup>                        | 2.218 (15)             | Mg1—O1 <sup>xii</sup>                      | 2.102 (3)              |
| Na1—O2 <sup>ii</sup>                       | 2.218 (15)             | Mg1—O1 <sup>iii</sup>                      | 2.102 (3)              |
| Na2—O1                                     | 2.437 (4)              | Mg1—O1 <sup>iv</sup>                       | 2.102 (3)              |
| Na2—O1 <sup>iii</sup>                      | 2.437 (4)              | Zn1—O1 <sup>xiii</sup>                     | 1.947 (3)              |
| Na2—O1 <sup>iv</sup>                       | 2.437 (4)              | Zn1—O1 <sup>i</sup>                        | 1.947 (3)              |
| Na2—O2 <sup>i</sup>                        | 2.68 (3)               | Zn1—O1                                     | 1.947 (3)              |
| Na2—O2 <sup>v</sup>                        | 2.68 (3)               | Zn1—O2                                     | 1.990 (9)              |
| Na2—O2 <sup>vi</sup>                       | 2.68 (3)               | Zn1—O2 <sup>i</sup>                        | 1.990 (9)              |
| Na2—O3 <sup>vii</sup>                      | 2.431 (18)             | Zn1—O2 <sup>xiii</sup>                     | 1.990 (9)              |
| Na2—O3 <sup>iii</sup>                      | 2.386 (18)             | B1—O1                                      | 1.378 (3)              |
| Na2—O3                                     | 2.386 (18)             | B1—O1 <sup>xiv</sup>                       | 1.378 (3)              |
| Na2—O3 <sup>viii</sup>                     | 2.431 (18)             | B1—O1 <sup>vi</sup>                        | 1.378 (3)              |
| Na2—O3 <sup>ix</sup>                       | 2.431 (18)             | B2—O2 <sup>xiii</sup>                      | 1.411 (15)             |
| Na2—O3 <sup>iv</sup>                       | 2.386 (18)             | B2—O2 <sup>xv</sup>                        | 1.411 (15)             |
| Mg1—O1 <sup>x</sup>                        | 2.102 (3)              | B2—O3 <sup>xvi</sup>                       | 1.435 (18)             |
| Mg1—O1                                     | 2.102 (3)              | B2—O3 <sup>xiv</sup>                       | 1.435 (18)             |
| Mg1—O1 <sup>xi</sup>                       | 2.102 (3)              |                                            |                        |
| <b>Atoms 1,2,3</b>                         | <b>Angle 1,2,3 [°]</b> | <b>Atoms 1,2,3</b>                         | <b>Angle 1,2,3 [°]</b> |
| O2 <sup>ii</sup> —Na1—O2 <sup>i</sup>      | 62.6 (6)               | O1 <sup>iv</sup> —Mg1—O1 <sup>iii</sup>    | 85.48 (12)             |
| O3 <sup>xiv</sup> —Na1—O2 <sup>i</sup>     | 50.5 (12)              | O1 <sup>x</sup> —Mg1—O1 <sup>iii</sup>     | 180.0                  |
| O3 <sup>xvii</sup> —Na1—O2 <sup>ii</sup>   | 141.7 (7)              | O1 <sup>xi</sup> —Mg1—O1                   | 180.00 (16)            |
| O3—Na1—O2 <sup>ii</sup>                    | 102.4 (11)             | O1 <sup>xii</sup> —Mg1—O1 <sup>iv</sup>    | 180.0                  |
| O3 <sup>vi</sup> —Na1—O2 <sup>ii</sup>     | 143.2 (7)              | O1—Mg1—O1 <sup>xii</sup>                   | 94.52 (12)             |
| O3 <sup>xiv</sup> —Na1—O2 <sup>ii</sup>    | 52.3 (12)              | O1 <sup>xi</sup> —Mg1—O1 <sup>iii</sup>    | 94.52 (12)             |
| O3 <sup>xv</sup> —Na1—O2 <sup>ii</sup>     | 101.1 (10)             | O1 <sup>xii</sup> —Mg1—O1 <sup>iii</sup>   | 94.52 (12)             |
| O3 <sup>vi</sup> —Na1—O2 <sup>i</sup>      | 141.7 (7)              | O1 <sup>xi</sup> —Mg1—O1 <sup>x</sup>      | 85.48 (12)             |
| O3 <sup>xv</sup> —Na1—O2 <sup>i</sup>      | 102.4 (10)             | O1—Mg1—O1 <sup>iv</sup>                    | 85.48 (12)             |
| O3 <sup>xvii</sup> —Na1—O2 <sup>i</sup>    | 143.2 (7)              | O1 <sup>xiii</sup> —Zn1—O1                 | 113.66 (7)             |
| O3—Na1—O2 <sup>i</sup>                     | 101.1 (10)             | O1 <sup>i</sup> —Zn1—O1 <sup>xiii</sup>    | 113.66 (7)             |
| O3 <sup>viii</sup> —Na1—O3                 | 60.7 (14)              | O1 <sup>i</sup> —Zn1—O1                    | 113.66 (7)             |
| O3—Na1—O3 <sup>vi</sup>                    | 98.2 (7)               | O1—Zn1—O2 <sup>i</sup>                     | 92.2 (4)               |
| O3 <sup>xiv</sup> —Na1—O3 <sup>vi</sup>    | 114.9 (5)              | O1 <sup>i</sup> —Zn1—O2 <sup>i</sup>       | 116.2 (6)              |
| O3 <sup>viii</sup> —Na1—O3 <sup>xvii</sup> | 114.9 (5)              | O1 <sup>xiii</sup> —Zn1—O2 <sup>i</sup>    | 105.5 (8)              |
| O3 <sup>viii</sup> —Na1—O3 <sup>xiv</sup>  | 86 (2)                 | O1—Zn1—O2                                  | 116.2 (6)              |
| O3 <sup>xv</sup> —Na1—O3 <sup>xvii</sup>   | 98.2 (7)               | O1 <sup>i</sup> —Zn1—O2 <sup>xiii</sup>    | 92.2 (4)               |
| O3 <sup>xiv</sup> —Na1—O3                  | 146.8 (11)             | O1—Zn1—O2 <sup>xiii</sup>                  | 105.5 (8)              |
| O3 <sup>viii</sup> —Na1—O3 <sup>xv</sup>   | 146.8 (11)             | O1 <sup>i</sup> —Zn1—O2                    | 105.5 (8)              |
| O3 <sup>xv</sup> —Na1—O3                   | 152.5 (16)             | O1 <sup>xiii</sup> —Zn1—O2                 | 92.2 (4)               |
| O3—Na1—O3 <sup>xvii</sup>                  | 54.3 (11)              | O1 <sup>xiii</sup> —Zn1—O2 <sup>xiii</sup> | 116.2 (6)              |
| O3 <sup>viii</sup> —Na1—O3 <sup>vi</sup>   | 158.9 (16)             | O1 <sup>vi</sup> —B1—O1                    | 120.000 (4)            |
| O3 <sup>xiv</sup> —Na1—O3 <sup>xvii</sup>  | 158.9 (16)             | O1 <sup>vi</sup> —B1—O1 <sup>xiv</sup>     | 120.000 (4)            |



|                                           |             |                                              |             |
|-------------------------------------------|-------------|----------------------------------------------|-------------|
| O1 <sup>iv</sup> —Na2—O1 <sup>iii</sup>   | 71.65 (14)  | O1 <sup>xiv</sup> —B1—O1                     | 120.000 (3) |
| O1 <sup>iv</sup> —Na2—O1                  | 71.65 (14)  | O2 <sup>xv</sup> —B2—O3 <sup>xvi</sup>       | 115.9 (11)  |
| O1 <sup>iii</sup> —Na2—O1                 | 71.65 (14)  | O2 <sup>xiii</sup> —B2—O3 <sup>xvi</sup>     | 118.0 (12)  |
| O1 <sup>iii</sup> —Na2—O2 <sup>vi</sup>   | 138.5 (3)   | O2 <sup>xiii</sup> —B2—O3 <sup>xiv</sup>     | 115.9 (11)  |
| O1—Na2—O2 <sup>vi</sup>                   | 99.4 (2)    | O2 <sup>xv</sup> —B2—O3 <sup>xiv</sup>       | 118.0 (12)  |
| O1 <sup>iv</sup> —Na2—O2 <sup>i</sup>     | 138.5 (3)   | Mg1—O1—Na2                                   | 85.88 (11)  |
| O1—Na2—O2 <sup>v</sup>                    | 138.5 (3)   | Zn1—O1—Na2                                   | 89.09 (12)  |
| O1 <sup>iv</sup> —Na2—O2 <sup>v</sup>     | 99.4 (2)    | Zn1—O1—Mg1                                   | 111.11 (15) |
| O1 <sup>iii</sup> —Na2—O2 <sup>i</sup>    | 99.4 (2)    | B1—O1—Na2                                    | 119.3 (4)   |
| O1 <sup>iv</sup> —Na2—O2 <sup>vi</sup>    | 67.1 (3)    | B1—O1—Mg1                                    | 124.5 (3)   |
| O1—Na2—O2 <sup>i</sup>                    | 67.1 (3)    | B1—O1—Zn1                                    | 117.3 (2)   |
| O1 <sup>iii</sup> —Na2—O2 <sup>v</sup>    | 67.1 (3)    | Na1 <sup>xiii</sup> —O2—Na1 <sup>xviii</sup> | 10.3 (4)    |
| O2 <sup>v</sup> —Na2—O2 <sup>vi</sup>     | 114.58 (17) | Na1 <sup>xiii</sup> —O2—Na2 <sup>xix</sup>   | 80.1 (6)    |
| O2 <sup>i</sup> —Na2—O2 <sup>v</sup>      | 114.58 (17) | Na1 <sup>xiii</sup> —O2—Na2 <sup>xx</sup>    | 80.1 (6)    |
| O2 <sup>i</sup> —Na2—O2 <sup>vi</sup>     | 114.58 (17) | Na2 <sup>xx</sup> —O2—Na1 <sup>xviii</sup>   | 70.4 (5)    |
| O3 <sup>iii</sup> —Na2—O1 <sup>iv</sup>   | 170.8 (5)   | Na2 <sup>xix</sup> —O2—Na1 <sup>xviii</sup>  | 84.6 (5)    |
| O3 <sup>iii</sup> —Na2—O1 <sup>iii</sup>  | 103.1 (5)   | Na2 <sup>xx</sup> —O2—Na2 <sup>xix</sup>     | 130.6 (4)   |
| O3 <sup>viii</sup> —Na2—O1                | 96.0 (4)    | Zn1—O2—Na1 <sup>xviii</sup>                  | 128.0 (5)   |
| O3—Na2—O1 <sup>iii</sup>                  | 170.8 (5)   | Zn1—O2—Na1 <sup>xiii</sup>                   | 135.3 (5)   |
| O3 <sup>iii</sup> —Na2—O1                 | 114.4 (4)   | Zn1—O2—Na2 <sup>xx</sup>                     | 81.7 (7)    |
| O3 <sup>vii</sup> —Na2—O1 <sup>iv</sup>   | 136.6 (5)   | Zn1—O2—Na2 <sup>xix</sup>                    | 81.6 (7)    |
| O3 <sup>viii</sup> —Na2—O1 <sup>iv</sup>  | 145.1 (5)   | B2—O2—Na1 <sup>xviii</sup>                   | 79.4 (7)    |
| O3—Na2—O1                                 | 103.1 (5)   | B2 <sup>xiii</sup> —O2—Na1 <sup>xiii</sup>   | 74.4 (6)    |
| O3 <sup>viii</sup> —Na2—O1 <sup>iii</sup> | 136.6 (5)   | B2 <sup>i</sup> —O2—Na1 <sup>xviii</sup>     | 100.9 (8)   |
| O3 <sup>iv</sup> —Na2—O1 <sup>iii</sup>   | 114.4 (4)   | B2 <sup>xiii</sup> —O2—Na1 <sup>xviii</sup>  | 83.1 (5)    |
| O3 <sup>vii</sup> —Na2—O1 <sup>iii</sup>  | 96.0 (4)    | B2—O2—Na1 <sup>xiii</sup>                    | 74.4 (6)    |
| O3 <sup>vii</sup> —Na2—O1                 | 145.1 (5)   | B2 <sup>i</sup> —O2—Na1 <sup>xiii</sup>      | 94.0 (8)    |
| O3—Na2—O1 <sup>iv</sup>                   | 114.4 (4)   | B2—O2—Na2 <sup>xx</sup>                      | 95.6 (17)   |
| O3 <sup>ix</sup> —Na2—O1 <sup>iv</sup>    | 96.0 (4)    | B2 <sup>i</sup> —O2—Na2 <sup>xix</sup>       | 113.0 (14)  |
| O3 <sup>ix</sup> —Na2—O1                  | 136.6 (5)   | B2 <sup>i</sup> —O2—Na2 <sup>xx</sup>        | 113.2 (14)  |
| O3 <sup>iv</sup> —Na2—O1 <sup>iv</sup>    | 103.1 (5)   | B2 <sup>xiii</sup> —O2—Na2 <sup>xix</sup>    | 95.4 (17)   |
| O3 <sup>iv</sup> —Na2—O1                  | 170.8 (5)   | B2 <sup>xiii</sup> —O2—Na2 <sup>xx</sup>     | 121.7 (15)  |
| O3 <sup>ix</sup> —Na2—O1 <sup>iii</sup>   | 145.1 (5)   | B2—O2—Na2 <sup>xix</sup>                     | 121.5 (16)  |
| O3 <sup>viii</sup> —Na2—O2 <sup>v</sup>   | 110.3 (5)   | B2 <sup>i</sup> —O2—Zn1                      | 130.7 (9)   |
| O3 <sup>iv</sup> —Na2—O2 <sup>i</sup>     | 117.0 (5)   | B2—O2—Zn1                                    | 148.1 (11)  |
| O3 <sup>iii</sup> —Na2—O2 <sup>v</sup>    | 71.5 (6)    | B2 <sup>xiii</sup> —O2—Zn1                   | 147.9 (11)  |
| O3 <sup>ix</sup> —Na2—O2 <sup>v</sup>     | 83.6 (6)    | B2 <sup>xiii</sup> —O2—B2 <sup>i</sup>       | 24.1 (14)   |
| O3 <sup>ix</sup> —Na2—O2 <sup>i</sup>     | 110.3 (5)   | B2—O2—B2 <sup>xiii</sup>                     | 27.2 (16)   |
| O3 <sup>vii</sup> —Na2—O2 <sup>vi</sup>   | 110.3 (5)   | B2—O2—B2 <sup>i</sup>                        | 24.1 (14)   |
| O3—Na2—O2 <sup>i</sup>                    | 71.5 (5)    | Na1 <sup>vi</sup> —O3—Na1                    | 26.9 (11)   |
| O3—Na2—O2 <sup>v</sup>                    | 117.0 (5)   | Na1—O3—Na1 <sup>xiv</sup>                    | 21.8 (7)    |
| O3 <sup>iv</sup> —Na2—O2 <sup>vi</sup>    | 71.5 (5)    | Na1—O3—Na2 <sup>ix</sup>                     | 102.0 (9)   |
| O3 <sup>vii</sup> —Na2—O2 <sup>i</sup>    | 83.6 (6)    | Na1 <sup>xiv</sup> —O3—Na2 <sup>ix</sup>     | 115.3 (8)   |
| O3 <sup>viii</sup> —Na2—O2 <sup>vi</sup>  | 83.6 (6)    | Na1 <sup>vi</sup> —O3—Na2                    | 120.6 (13)  |

|                                           |            |                                          |            |
|-------------------------------------------|------------|------------------------------------------|------------|
| O3 <sup>iii</sup> —Na2—O2 <sup>vi</sup>   | 117.0 (5)  | Na1—O3—Na2                               | 103.9 (9)  |
| O3 <sup>iv</sup> —Na2—O3 <sup>viii</sup>  | 84.1 (6)   | Na1 <sup>xiv</sup> —O3—Na2               | 117.3 (9)  |
| O3 <sup>viii</sup> —Na2—O3 <sup>vii</sup> | 70.3 (7)   | Na1 <sup>vi</sup> —O3—Na2 <sup>ix</sup>  | 117.6 (12) |
| O3 <sup>iii</sup> —Na2—O3 <sup>ix</sup>   | 84.1 (6)   | Na1 <sup>vi</sup> —O3—B2 <sup>xxi</sup>  | 97.1 (14)  |
| O3 <sup>viii</sup> —Na2—O3 <sup>ix</sup>  | 70.3 (7)   | Na1—O3—B2 <sup>xxi</sup>                 | 123.9 (13) |
| O3 <sup>iii</sup> —Na2—O3 <sup>iv</sup>   | 71.8 (7)   | Na1 <sup>vi</sup> —O3—B2 <sup>vi</sup>   | 115.1 (14) |
| O3 <sup>vii</sup> —Na2—O3 <sup>ix</sup>   | 70.3 (7)   | Na2—O3—Na2 <sup>ix</sup>                 | 95.7 (6)   |
| O3—Na2—O3 <sup>iii</sup>                  | 71.8 (7)   | B2 <sup>xxi</sup> —O3—Na1 <sup>xiv</sup> | 102.1 (11) |
| O3—Na2—O3 <sup>iv</sup>                   | 71.8 (7)   | B2 <sup>vi</sup> —O3—Na1                 | 142.0 (14) |
| O3—Na2—O3 <sup>vii</sup>                  | 84.1 (6)   | B2 <sup>vi</sup> —O3—Na1 <sup>xiv</sup>  | 120.2 (11) |
| O1 <sup>xi</sup> —Mg1—O1 <sup>iv</sup>    | 94.52 (12) | B2 <sup>xxi</sup> —O3—Na2 <sup>ix</sup>  | 112.5 (9)  |
| O1—Mg1—O1 <sup>x</sup>                    | 94.52 (12) | B2 <sup>vi</sup> —O3—Na2                 | 103.3 (11) |
| O1 <sup>iv</sup> —Mg1—O1 <sup>x</sup>     | 94.52 (12) | B2 <sup>xxi</sup> —O3—Na2                | 114.5 (9)  |
| O1—Mg1—O1 <sup>iii</sup>                  | 85.48 (12) | B2 <sup>vi</sup> —O3—Na2 <sup>ix</sup>   | 101.2 (11) |
| O1 <sup>xii</sup> —Mg1—O1 <sup>x</sup>    | 85.48 (12) | O1 <sup>xi</sup> —Mg1—O1 <sup>xii</sup>  | 85.48 (12) |

(i)  $-x+y+1, -x+1, z$ ; (ii)  $x, x-y, -z+1/2$ ; (iii)  $-y+2, x-y+1, z$ ; (iv)  $-x+y+1, -x+2, z$ ; (v)  $x+1, y+1, z$ ; (vi)  $-y+1, x-y+1, z$ ; (vii)  $-x+y+1, y, -z+1/2$ ; (viii)  $x, x-y+1, -z+1/2$ ; (ix)  $-y+2, -x+2, -z+1/2$ ; (x)  $y, -x+y+1, -z+1$ ; (xi)  $-x+2, -y+2, -z+1$ ; (xii)  $x-y+1, x, -z+1$ ; (xiii)  $-y+1, x-y, z$ ; (xiv)  $-x+y, -x+1, z$ ; (xv)  $-y+1, -x+1, -z+1/2$ ; (xvi)  $-x+y, y-1, -z+1/2$ ; (xvii)  $-x+y, y, -z+1/2$ ; (xviii)  $-x+y, -x, z$ ; (xix)  $x, y-1, z$ ; (xx)  $x-1, y-1, z$ ; (xxi)  $x, y+1, z$ .

**Table S5.** Calculated bond valence sums (BVS) for I and II.

| <b>Atoms in I</b> | <b>BVS</b> |
|-------------------|------------|
| Na1               | 1.58       |
| Na2               | 0.84       |
| Ca1               | 2.17       |
| Zn1               | 2.19       |
| B1                | 2.98       |
| B2                | 2.66       |

  

| <b>Atoms in II</b> | <b>BVS</b> |
|--------------------|------------|
| Na1                | 2.03       |
| Na2                | 0.92       |
| Mg1                | 1.99       |
| Zn1                | 2.02       |
| B1                 | 2.83       |
| B2                 | 2.65       |

### **Atomic assignments in the structural refinement of I and II.**

Normal atoms in the asymmetric units of **I** and **II** were automatically determined by ShelXT, meanwhile split atoms of 'Na1', 'O2', and 'B2' were also assigned to be normal atoms by ShelXT. At that time, the abnormal structural indicators of  $R_1$  and  $wR_2$  as well as the abnormal atomic displacement parameters of 'Na1', 'O2' and 'B2' were first clues to the splitting of them. Hence, through the splitting of 'Na1', 'O2' and 'B2', structural indicators of **I** and **II** were rationalized to a reasonable level. Still, the abnormal coordination mode of 'B2' (two-coordinated to oxygen atoms) as well as the charge imbalance of their molecular sums ( $\text{Na}_3\text{CaZn}_2\text{B}_3\text{O}_8$  and  $\text{Na}_3\text{MgZn}_2\text{B}_3\text{O}_8$ ) indicated that there are oxygen atoms near 'B2' to be determined. Accordingly, largest diff. peaks in **I** and **II** near 'B2' were assigned to be 'O3' with partially-occupied displacements, which realized the charge balance of their molecular sums, the three-coordinated connection mode of 'B2' as well as the rationalizing of  $R_1$  and  $wR_2$ .
